# Supplementary material for: Development and Evaluation of Nanoemulsifying Preconcentrate of Curcumin for Colon Delivery
Source: Hindawi journal article supplement (doi:10.1155/2015/541510), 2015-01-01

## Supplementary File

**Table 1: Summary of each factor effect and its p-values for responses (Mean Globule size, emulsification time and t85%)**

| Factor                            | Y <sub>1</sub> <sup>≈</sup> |               | Y <sub>2</sub> <sup>∨</sup> |                   | Y <sub>3</sub> <sup>β</sup> |               |
|-----------------------------------|-----------------------------|---------------|-----------------------------|-------------------|-----------------------------|---------------|
|                                   | Factor effect               | p value       | Factor effect               | p value           | Factor effect               | p value       |
| <b>Intercept</b>                  | <b>152.96</b>               |               | <b>4.30</b>                 |                   | <b>23.63</b>                |               |
| <b>X<sub>1</sub><sup>@</sup></b>  | <b>13.39</b>                | <b>0.0081</b> | <b>-0.30</b>                | <b>0.0385</b>     | <b>-0.60</b>                | <b>0.1911</b> |
| <b>X<sub>2</sub><sup>§</sup></b>  | <b>-13.79</b>               | <b>0.0070</b> | <b>1.18</b>                 | <b>&lt;0.0001</b> | <b>2.02</b>                 | <b>0.0017</b> |
| <b>X<sub>3</sub><sup>*</sup></b>  | <b>5.03</b>                 | <b>0.2124</b> | <b>-0.65</b>                | <b>0.0009</b>     | <b>-0.97</b>                | <b>0.0510</b> |
| <b>X<sub>1</sub>X<sub>2</sub></b> | <b>2.90</b>                 | <b>0.5930</b> | <b>0.080</b>                | <b>0.6489</b>     | <b>0.42</b>                 | <b>0.4969</b> |
| <b>X<sub>1</sub>X<sub>3</sub></b> | <b>-13.28</b>               | <b>0.0374</b> | <b>0.29</b>                 | <b>0.1284</b>     | <b>0.085</b>                | <b>0.8881</b> |
| <b>X<sub>2</sub>X<sub>3</sub></b> | <b>-8.88</b>                | <b>0.1304</b> | <b>0.22</b>                 | <b>0.2371</b>     | <b>0.50</b>                 | <b>0.4215</b> |
| <b>X<sub>1</sub><sup>2</sup></b>  | <b>0.74</b>                 | <b>0.8868</b> | <b>0.14</b>                 | <b>0.4366</b>     | <b>0.94</b>                 | <b>0.1426</b> |
| <b>X<sub>2</sub><sup>2</sup></b>  | <b>5.64</b>                 | <b>0.3004</b> | <b>-0.66</b>                | <b>0.0049</b>     | <b>-0.82</b>                | <b>0.1899</b> |
| <b>X<sub>3</sub><sup>2</sup></b>  | <b>-5.53</b>                | <b>0.3096</b> | <b>0.70</b>                 | <b>0.0036</b>     | <b>0.23</b>                 | <b>0.7001</b> |

<sup>@</sup>Peceol (oil); <sup>§</sup>Cremophor EL (polymer); <sup>\*</sup> Transcutol HP (adsorbent)

<sup>≈</sup> Mean globule size (nm); <sup>∨</sup> Emulsification time (min); <sup>β</sup> t<sub>85</sub>% (min)

**Table 2: ANOVA summary of measured response (Mean globule size, Emulsification time and  $t_{85\%}$ )**

| Model    |         |                |       |                |       |      | Lack of Fit        |         |                |
|----------|---------|----------------|-------|----------------|-------|------|--------------------|---------|----------------|
| Response | F Value | F-Significance | $R^2$ | Adjusted $R^2$ | S.D.  | % CV | Adequate Precision | F value | F significance |
| $Y_1^z$  | 4.62    | 0.0280         | 0.855 | 0.670          | 10.36 | 6.75 | 8.450              | 3.08    | 0.152          |
| $Y_2^v$  | 19.22   | 0.0004         | 0.961 | 0.911          | 0.34  | 7.91 | 16.160             | 1.11    | 0.444          |
| $Y_3^b$  | 4.19    | 0.0360         | 0.843 | 0.642          | 1.17  | 4.90 | 7.721              | 2.19    | 0.232          |

<sup>z</sup>Mean globule size (nm); <sup>v</sup>Emulsification time (min); <sup>b</sup> $t_{85\%}$  (min)

**Figure 1. DSC scans of Curcumin [A]; Aerosil® 200 [B]; CUR - Aerosil® 200 Physical mixture [C]; and optimized formulation, SP2 [D]**

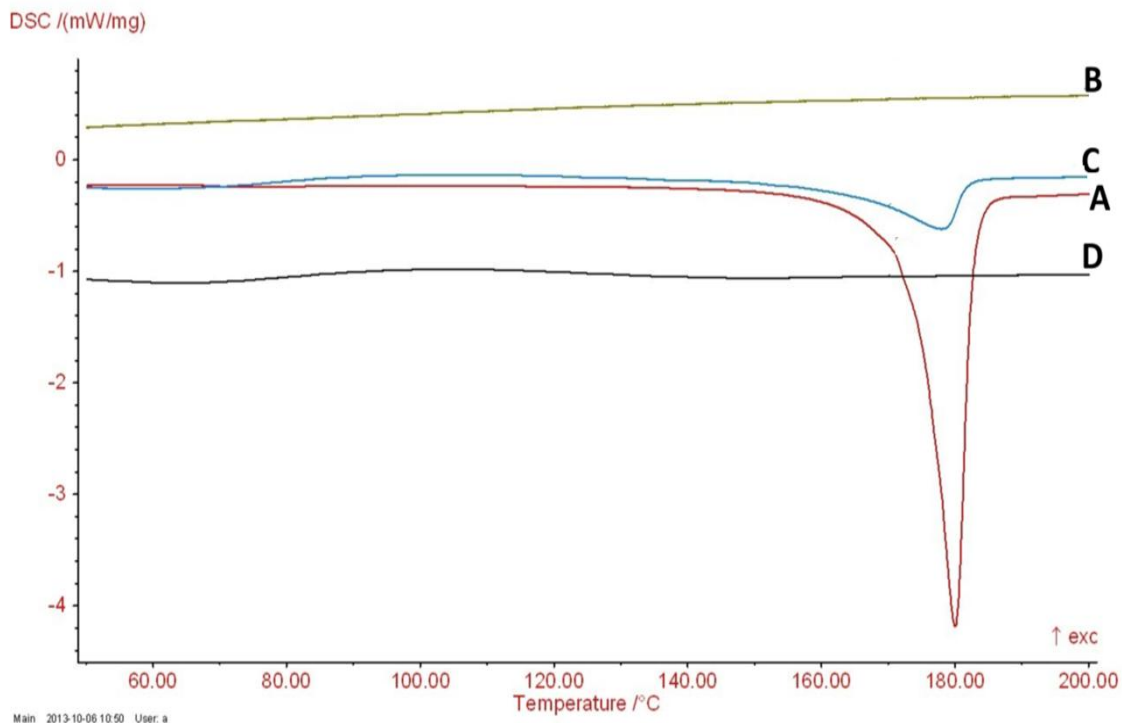

**Figure 2. Overlay of XRD pattern of free Curcumin [A]; Aerosil® 200 [B]; CUR - Aerosil® 200 Physical mixture [C]; and optimized formulation, SP2 [D]**

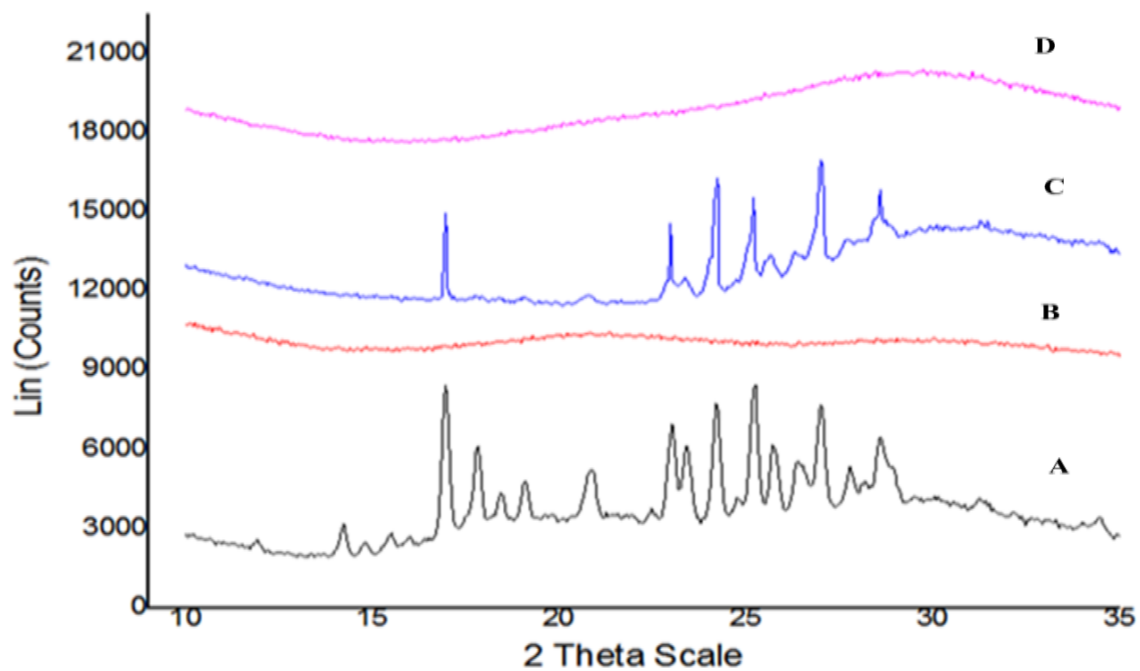

**Figure 3. Evaluation of the standardized effects of the Peceol ( $X_1$ ), Cremophor<sup>®</sup> EL ( $X_2$ ) and Transcutol<sup>®</sup> HP ( $X_3$ ), and their interactions on mean globule size ( $Y_1$ ), Emulsification time ( $Y_2$ ), time taken to release 85% drug ( $t_{85\%}$ ) ( $Y_3$ )**

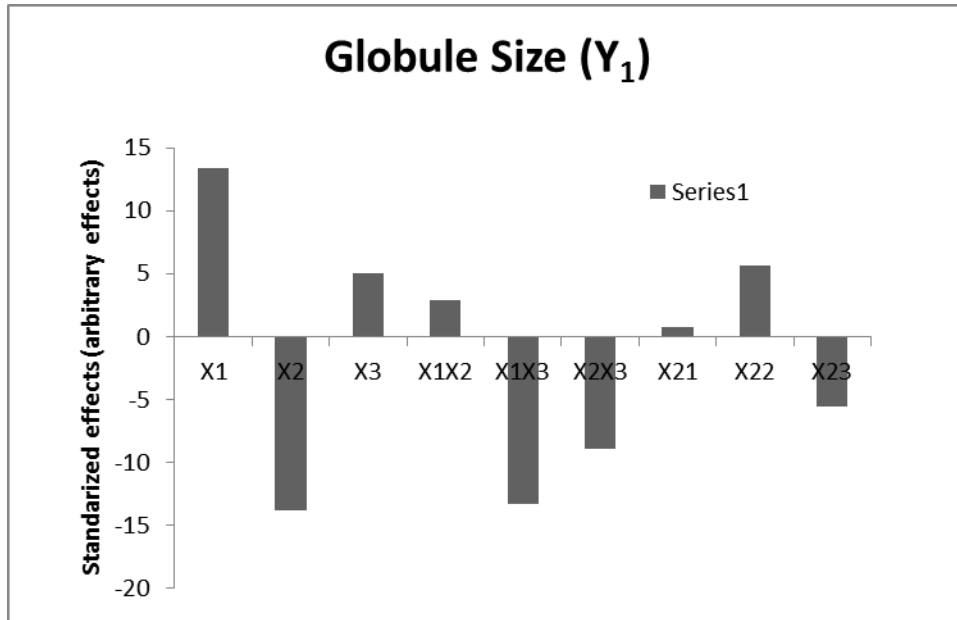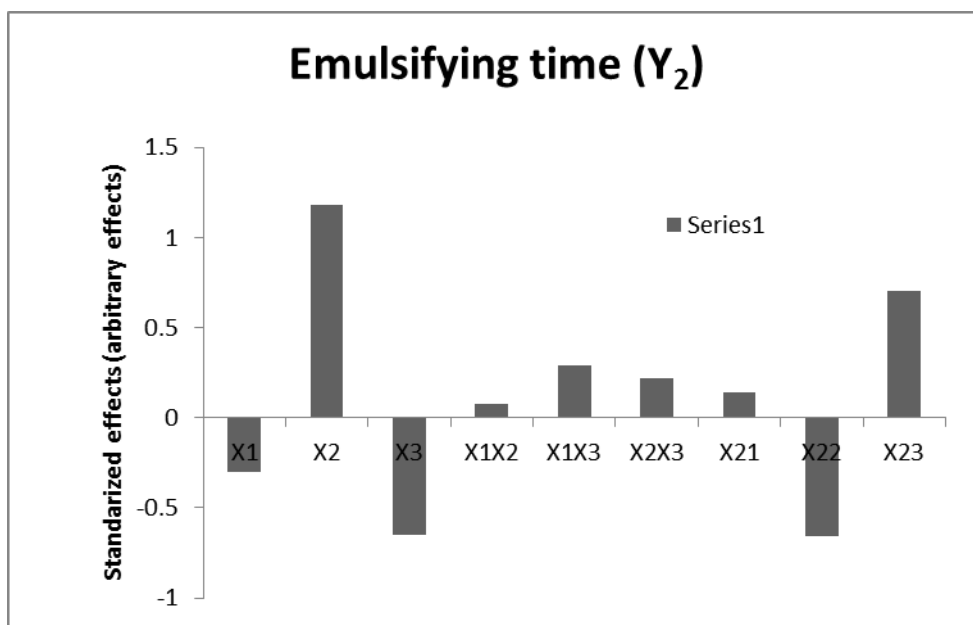

### t85% (Y<sub>3</sub>)

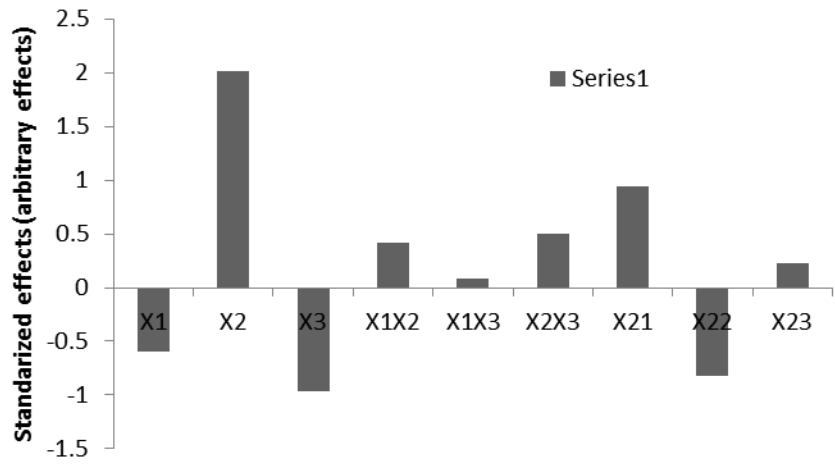

Supplement: f1 [file 541510.f1.pdf]
